# Supplementary material
Source: PubMed Central journal article supplement (PMC3776143)
Supplement: NIHMS54214-supplement-supporting_info.pdf [file NIHMS54214-supplement-supporting_info.pdf]

**Table S1. Alteration of *clsA* expression affects hyphal growth and branching**

|                                            | 0 $\mu\text{g ml}^{-1}$ atc |      |                  |      | 1.5 $\mu\text{g ml}^{-1}$ atc |      |                  |       | 0 $\mu\text{M}$ thiostrepton |      |                 |      | 100 $\mu\text{M}$ thiostrepton |      |                  |       |
|--------------------------------------------|-----------------------------|------|------------------|------|-------------------------------|------|------------------|-------|------------------------------|------|-----------------|------|--------------------------------|------|------------------|-------|
|                                            | A, M145 (n=83)              |      | B, RJ118b (n=60) |      | C, M145 (n=75)                |      | D, RJ118b (n=88) |       | E, VJ8600 (n=56)             |      | F, RJ110 (n=74) |      | G, VJ8600 (n=69)               |      | H, RJ110 (n=108) |       |
| Parameter                                  | Mean                        | SD   | Mean             | SD   | Mean                          | SD   | Mean             | SD    | Mean                         | SD   | Mean            | SD   | Mean                           | SD   | Mean             | SD    |
| 1 Substrate hyphal width ( $\mu\text{m}$ ) | 0.54                        | 0.01 | 0.51             | 0.01 | 0.56                          | 0.03 | 0.67             | 0.16  | 0.57                         | 0.06 | 0.69            | 0.04 | 0.54                           | 0.02 | 1.21             | 0.26  |
| 2 Spore width ( $\mu\text{m}$ )            | 0.96                        | 0.02 | ND               | ND   | 0.95                          | 0.02 | 1.03             | 0.15  | 0.97                         | 0.02 | 1.01            | 0.06 | 0.96                           | 0.01 | 1.89             | 0.40  |
| 3 Tip growth distance ( $\mu\text{m}$ )    | 2.99                        | 0.68 | 4.90             | 0.79 | 3.34                          | 0.47 | 1.62             | 0.39  | 2.49                         | 0.50 | 2.89            | 0.13 | 2.66                           | 0.87 | 1.98             | 0.23  |
| 4 Inter-branch distance ( $\mu\text{m}$ )  | 6.23                        | 1.63 | 13.88            | 4.97 | 5.18                          | 0.97 | 2.88             | 0.64  | 5.55                         | 1.49 | 5.28            | 0.46 | 6.34                           | 1.22 | 2.28             | 0.36  |
| 4 Tip growth angle ( $^{\circ}$ )          | 142.37                      | 2.75 | 157.38           | 5.20 | 141.77                        | 5.46 | 115.50           | 15.90 | 142.19                       | 1.34 | 138.75          | 2.49 | 139.93                         | 4.47 | 101.70           | 19.50 |
| 6 Branching angle ( $^{\circ}$ )           | 111.61                      | 5.69 | 101.08           | 3.95 | 114.28                        | 6.81 | 93.00            | 16.60 | 100.82                       | 8.33 | 97.55           | 2.96 | 100.82                         | 8.33 | 82.46            | 8.80  |

M145 (A, C), RJ118b (B, D), VJ8600 (E, G) and RJ110 (F, H) were grown in the absence (A, B, E, F) and presence of 1.5  $\mu\text{g ml}^{-1}$  atc (C, D) or 100  $\mu\text{M}$  thiostrepton (G, H) and a number of parameters that quantitatively described mycelial morphology (see Fig 4a) were measured, means calculated and displayed in the table. 1, hyphal width ( $\mu\text{m}$ ); 2, spore width ( $\mu\text{m}$ ); 3, tip growth distance (the distance between changes in tip direction) ( $\mu\text{m}$ ); 4, inter-branch distance ( $\mu\text{m}$ ); 5, tip growth angle (the angle which a hypha was bent following a change in tip growth direction) ( $^{\circ}$ ); 6, branching angle ( $^{\circ}$ ). SD, Standard Deviation.

**Table S2. Results of tests of significance between treated and untreated strains displaying altered mycelial morphology.**

|          | Parameter                          | A,B | C,D | A,C | B,D | E,F | G,H | E,G | F,H |
|----------|------------------------------------|-----|-----|-----|-----|-----|-----|-----|-----|
| <b>1</b> | <b>Substrate hyphal width (µm)</b> | S   | NS  | NS  | NS  | S   | S   | NS  | S   |
| <b>2</b> | <b>Spore width (µm)</b>            | ND  | NS  | NS  | ND  | NS  | S   | NS  | S   |
| <b>3</b> | <b>Tip growth distance (µm)</b>    | S   | S   | NS  | S   | NS  | S   | NS  | S   |
| <b>4</b> | <b>Inter-branch distance (µm)</b>  | S   | S   | NS  | S   | NS  | S   | NS  | S   |
| <b>5</b> | <b>Tip growth angle (°)</b>        | S   | S   | NS  | S   | S   | S   | NS  | S   |
| <b>6</b> | <b>Branching angle (°)</b>         | S   | S   | NS  | NS  | NS  | S   | NS  | S   |

S, significantly different ( $p < 0.05$ ); NS, not significantly different following a Students t-test between the strains/treatment listed in the column header and referring to the strain/treatment labeled A-H in Table S1A. ND- not determined (RJ118b was unable to produce aerial hyphae or sporulate in the absence of atc).

**Table S3. Primers used in this study**

CL100 CCCAAGCTTGGATCCAATCGGCTGCGAC  
CL101 GGGACTAGTCATATGTCTAGATGTGTATAAGAGACAGTCTGG  
CL102 GGGATATCCATATGAGCATCATTGGCTCGTT  
CL103 CCCAAGCTTCTAGATCAATCGGCTGCGACGT  
CL104 CGAGAGCCAGAGCTTTTTTTCGTTGAGGTAAGGTCAGTGATTCGGGGGATCCGTCGACC  
CL105 GGCCATCCGGCCACCGGGACCGCGCAATCGGCGAGTTCATGTAGGCGTGAGCTG  
*SCO1389\_F1* GAGCATCATTGGCTCGTTTC  
*SCO1389\_R1* GAACACCTGCCCACCAATAC  
*hrdB\_F* GAGGCGACCGAGGAGCCGAA  
*hrdB\_R* GCGGAGGTTGGCCTCCAGCA

Restriction sites (CL100-CL103) and homologous regions to *am'* (pIJ673; (Gust *et al.*, 2003)) are underlined (CL104 & CL105). The sections of CL104 & CL105 not underlined are sequences homologous to regions directly flanking *SCO1389*.

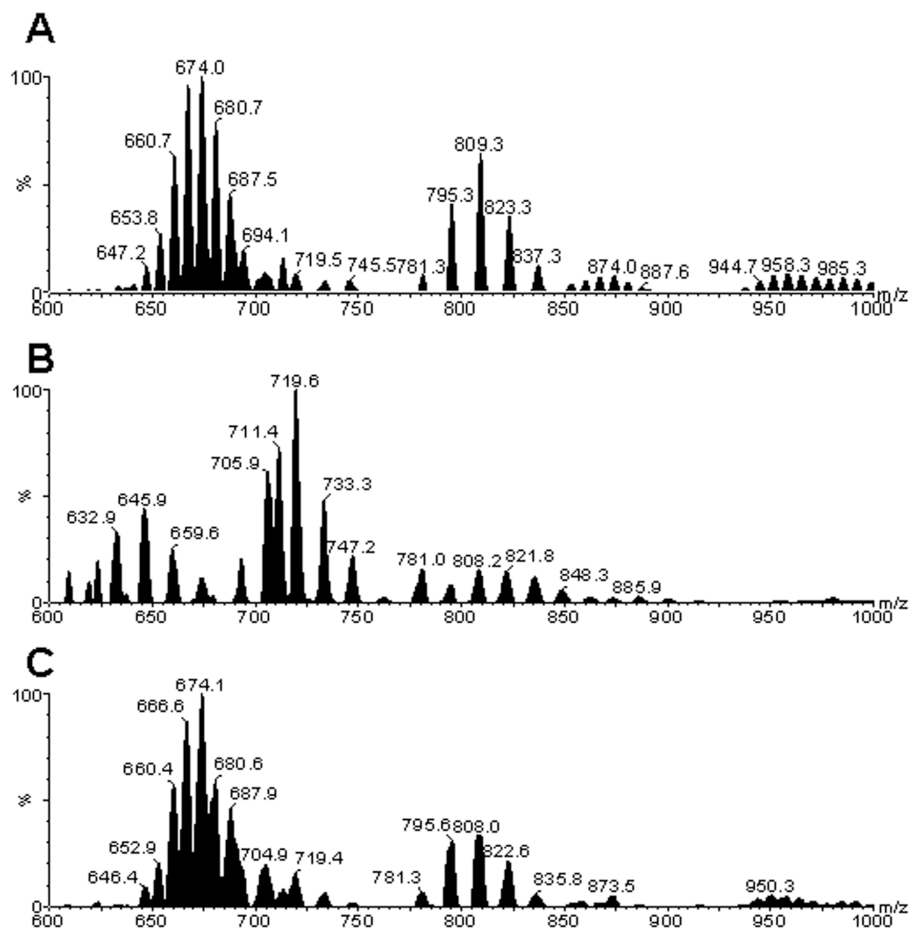

**Fig S1.** Negative ion ES-MS survey scans (600-1000 m/z) of total lipid extracts from M145 (A) and RJ118b in the absence (B) or presence (C) of 1.5  $\mu\text{g ml}^{-1}$  atc).

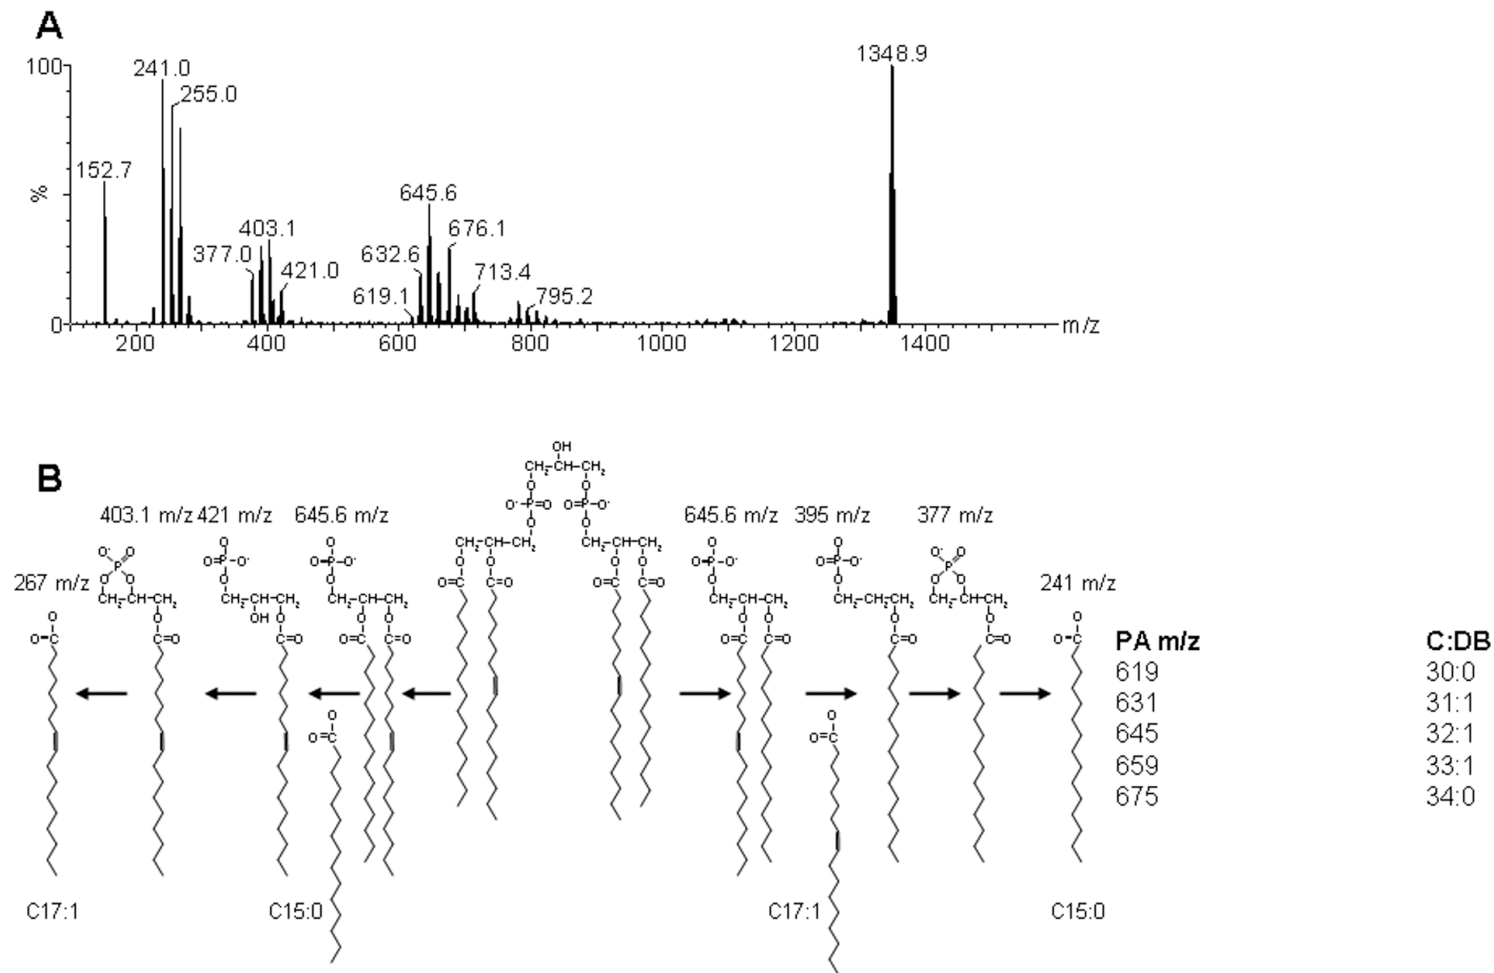

**Fig S2.** Fragmentation analysis of 1348.9 CL peak. A; ES-MS-MS daughter ion spectrum of the 1348.9 m/z ion. B; Assignment of some of the principal daughter ions from 1348.9 m/z peak according to their daughter ion fragments: [PA-H]<sup>-</sup>, [lysoPA-H]<sup>-</sup>, or [lysoPA-H<sub>2</sub>O-H]<sup>-</sup> and fatty acids based on their [M-H]<sup>-</sup> values observed in panel A. m/z of phosphatidic acid (PA) and numbers of carbon:double bond (C:DB) are also displayed.

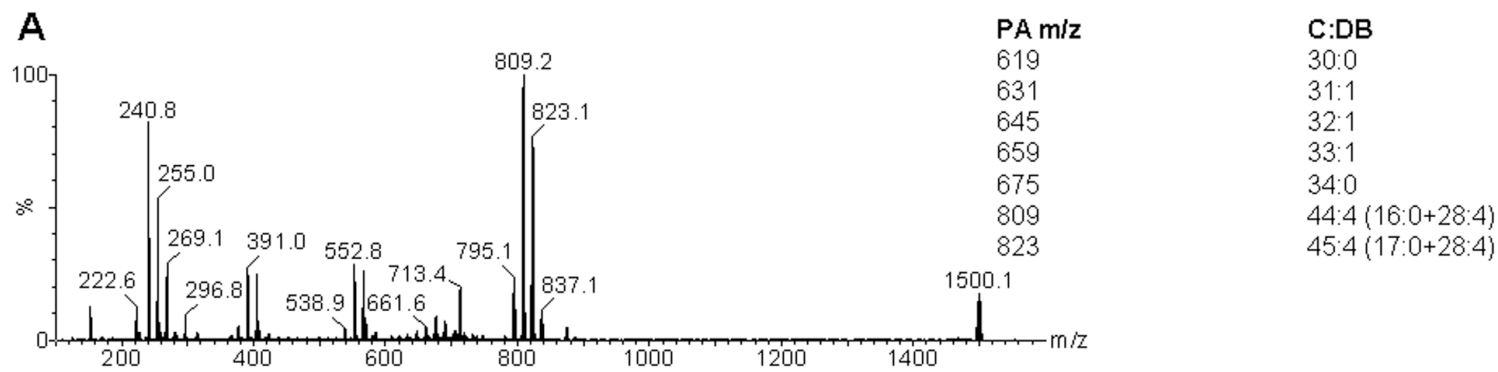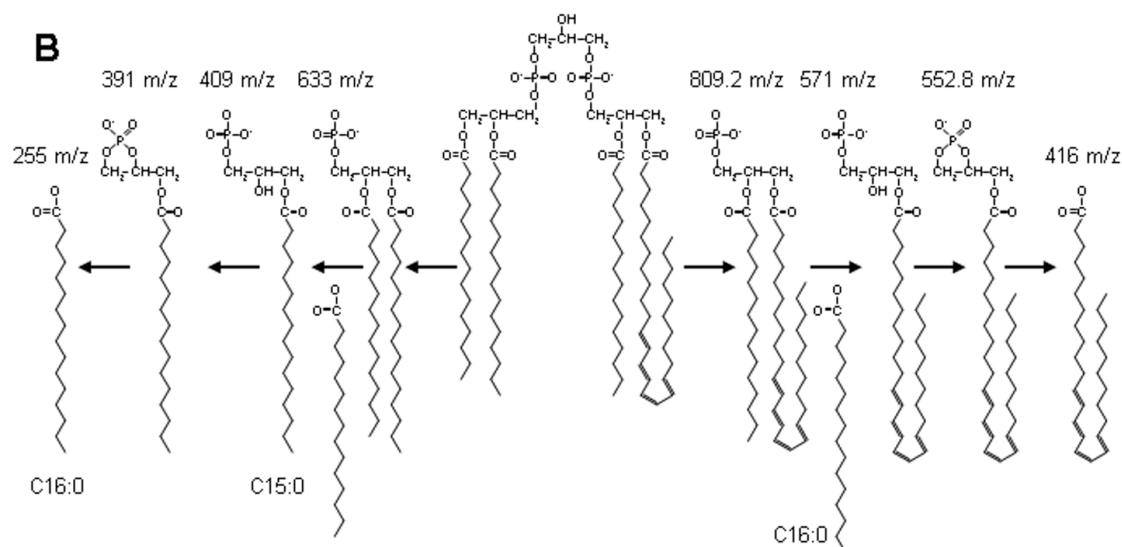

**Fig S3.** Fragmentation analysis of 1500.1 CL peak. A; ES-MS-MS daughter ion spectrum of the 1500.1 m/z ion. B; Assignment of some of the principal daughter ions from 1500.1 m/z peak according to their daughter ion fragments: [PA-H]<sup>-</sup>, [lysoPA-H]<sup>-</sup>, or [lysoPA-H<sub>2</sub>O-H]<sup>-</sup> and fatty acids based on their [M-H]<sup>-</sup> values observed in panel A. m/z of phosphatidic acid (PA) and numbers of carbon:double bond (C:DB) are also displayed.

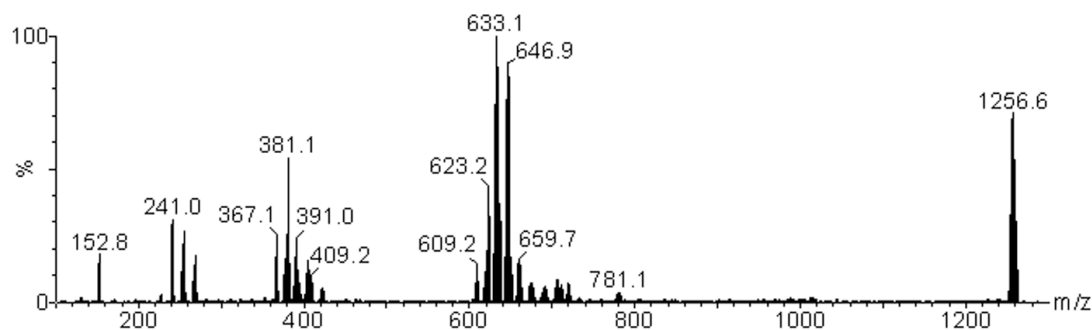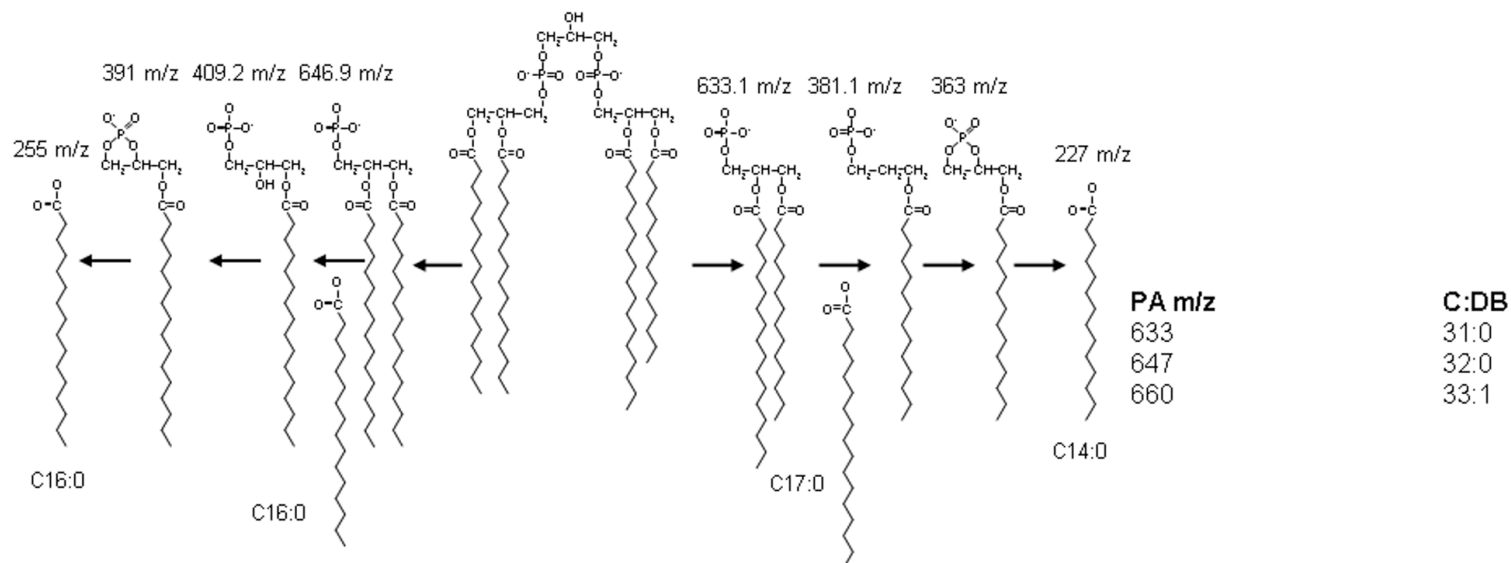

**Fig S4.** Fragmentation analysis of 1256.6 CL peak. A; ES-MS-MS daughter ion spectrum of the 1256.6 m/z ion. B; Assignment of some of the principal daughter ions from 1256.6 m/z peak according to their daughter ion fragments: [PA-H]<sup>-</sup>, [lysoPA-H]<sup>-</sup>, or [lysoPA-H<sub>2</sub>O-H]<sup>-</sup> and fatty acids based on their [M-H]<sup>-</sup> values observed in panel A. m/z of phosphatidic acid (PA) and numbers of carbon:double bond (C:DB) are also displayed
